# Supplementary material for: Robust spin manipulation in 2D organometallic Kagome lattices: a first-principles study
Source: Royal Society of Chemistry journal article supplement (doi:10.1039/d0cp00742k), 2020-01-01
Supplement: d0cp00742k1.pdf [file d0cp00742k1.pdf]

Supporting Information

# Robust Spin Manipulation in 2D Organometallic Kagome Lattice: A First-principles Study

Peng Wang,<sup>a</sup> Xue Jiang,<sup>b,\*</sup> Jun Hu,<sup>c</sup> Biao Wang,<sup>a</sup> Tingwei Zhou,<sup>a</sup> Hongkuan Yuan,<sup>a</sup> Jijun Zhao<sup>b</sup>

*<sup>a</sup>School of Physical Science and Technology, Southwest University, Chongqing 400715,*

*China*

*<sup>b</sup>Key Laboratory of Materials Modification by Laser, Ion and Electron Beams (Dalian University of Technology), Ministry of Education, Dalian 116024, China*

*<sup>c</sup>College of Physics, Optoelectronics and Energy, Soochow University, Suzhou, Jiangsu 215006,*

*China*

---

\* E-mail: jiangx@dlut.edu.cn

## Supplementary Note

In the work of Lado *et al.* (Ref. 16), they have included the anisotropy exchange term ( $\lambda$ ) in the Hamiltonian of the Heisenberg model. For CrI<sub>3</sub> monolayer, this term takes a significant effect on the calculated Curie temperature ( $T_C$ ). Because we cannot get the correct value of  $\lambda$  under our DFT framework. To clarify the underlying effect of the anisotropic exchange term, we construct the same Hamiltonian as in Ref. 16 and the anisotropy exchange term is included:

$$H = -\sum_{i,j} J_C \vec{S}_i \cdot \vec{S}_j - \sum_i D(S_i^z)^2 - \sum_{i,j} \lambda S_i^z S_j^z$$

We assume  $\lambda$  equals to 0, 0.1D, 0.3D, 0.5D and 0.7D for the Re<sub>3</sub>C<sub>12</sub>N<sub>12</sub>H<sub>12</sub> system. Then, Monte Carlo simulations are performed to calculate  $T_C$ . The variations of the heat capacity ( $C_V$ ) with respect to the temperature are shown in **Fig. S3**. It can be seen that the introduction of anisotropy exchange term will enhance the value of  $T_C$ , from approximately 330 K ( $\lambda=0$ ) to 440 K ( $\lambda=0.7D$ ). Hence, we believe the Curie temperature obtained by solving the Heisenberg model in the main text is a lower limit value and the current results are reliable.



**Fig. S1** FM and AFM structures in a  $\sqrt{3} \times 1$  supercell of the  $M_3C_{12}X_{12}$  monolayer. For clarity, only metal atoms are shown and the red and yellow ball refers atoms with magnetic moment along two opposite directions, i.e., spin up and spin down.



**Fig. S2** The spin charge density of  $W_3C_{12}N_{12}H_{12}$  and  $W_3C_{12}O_{12}$  in a  $\sqrt{3} \times 1$  supercell. Here, the spin charge density is defined as  $\rho = \rho_{up} - \rho_{down}$ . The value of the isosurfaces is  $0.0015 \text{ e}/\text{\AA}^{-3}$ . Yellow and cyan surfaces correspond to the isosurfaces of net spin up and spin down density, respectively.



**Fig. S3** Variation of the heat capacity ( $C_V$ , in arbitrary unit) with respect to the temperature for  $\text{Re}_3\text{C}_{12}\text{N}_{12}\text{H}_{12}$  with the anisotropic exchange parameter  $\lambda$  equals to 0, 0.1D, 0.3D, 0.5D and 0.7D, respectively.



**Fig. S4** Spin-polarized band structure of  $\text{Re}_3\text{C}_{12}\text{S}_{12}$  (a) and  $\text{Os}_3\text{C}_{12}\text{S}_{12}$  (b) monolayers. Red and black lines correspond to spin up and spin down bands, respectively.



**Fig. S5** Top and side views of the snapshot of  $\text{Re}_3\text{C}_{12}\text{N}_{12}\text{H}_{12}$  and  $\text{Re}_3\text{C}_{12}\text{O}_{12}$  in the  $\sqrt{3} \times 1$  supercell after 10 ps of MD simulation at 400 K.

**Table S1** Reaction heat ( $\Delta H$ ) of  $M_3C_{12}X_{12}$  monolayers per formula unit. The unit is in eV.

|                         | Ta     | W      | Re     | Os     |
|-------------------------|--------|--------|--------|--------|
| $M_3C_{12}S_{12}$       | -8.67  | -11.17 | -11.43 | -15.99 |
| $M_3C_{12}N_{12}H_{12}$ | -5.75  | -7.04  | -5.61  | -10.59 |
| $M_3C_{12}O_{12}$       | -10.69 | -8.2   | -5.81  | -7.71  |
